# Supplementary material for: Lead-Free Cesium Titanium Bromide Double Perovskite Nanocrystals
Source: MDPI journal article supplement (doi:10.3390/nano11061458), 2021-05-31
Supplement: s1 [file s1]

## Supplementary Material (SM)

# Lead-Free Cesium Titanium Bromide Double Perovskite Nanocrystals

G. Krishnamurthy Grandhi <sup>1,†</sup>, Anastasia Matuhina <sup>1,†</sup>, Maning Liu <sup>1</sup>, Shambhavee Annurakshita <sup>2</sup>, Harri Ali-Löytty <sup>3</sup>, Godofredo Bautista <sup>2</sup> and Paola Vivo <sup>1,\*</sup>

<sup>1</sup> Hybrid Solar Cells, Faculty of Engineering and Natural Sciences, Tampere University, P.O. Box 541, FI-33014 Tampere, Finland; murthy.grandhi@tuni.fi (G.K.G.); anastasiia.matiukhina@tuni.fi (A.M.); maning.liu@tuni.fi (M.L.)

<sup>2</sup> Photonics Laboratory, Physics Unit, Faculty of Engineering and Natural Sciences, Tampere University, FI-33014 Tampere, Finland; shambhavee.annurakshita@tuni.fi (S.A.); godofredo.bautista@tuni.fi (G.B.)

<sup>3</sup> Surface Science Group, Photonics Laboratory, Tampere University, P.O. Box 692, FI-33014 Tampere, Finland; harri.ali-loytt@tuni.fi

\* Correspondence: paola.vivo@tuni.fi; Tel.: +358-44-3407081

† G. Krishnamurthy Grandhi and Anastasia Matuhina contributed equally to this work.

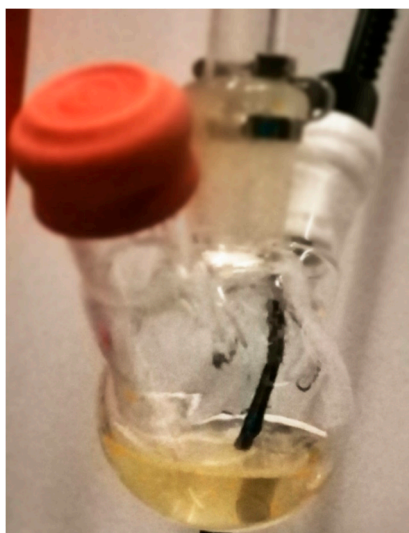

**Figure S1.** Photograph of the reaction flask (under room light) after hot-injection of cesium oleate into a solution of  $\text{TiBr}_4$  at 185 °C. No  $\text{Cs}_2\text{TiBr}_6$  NC formation took place in this case.

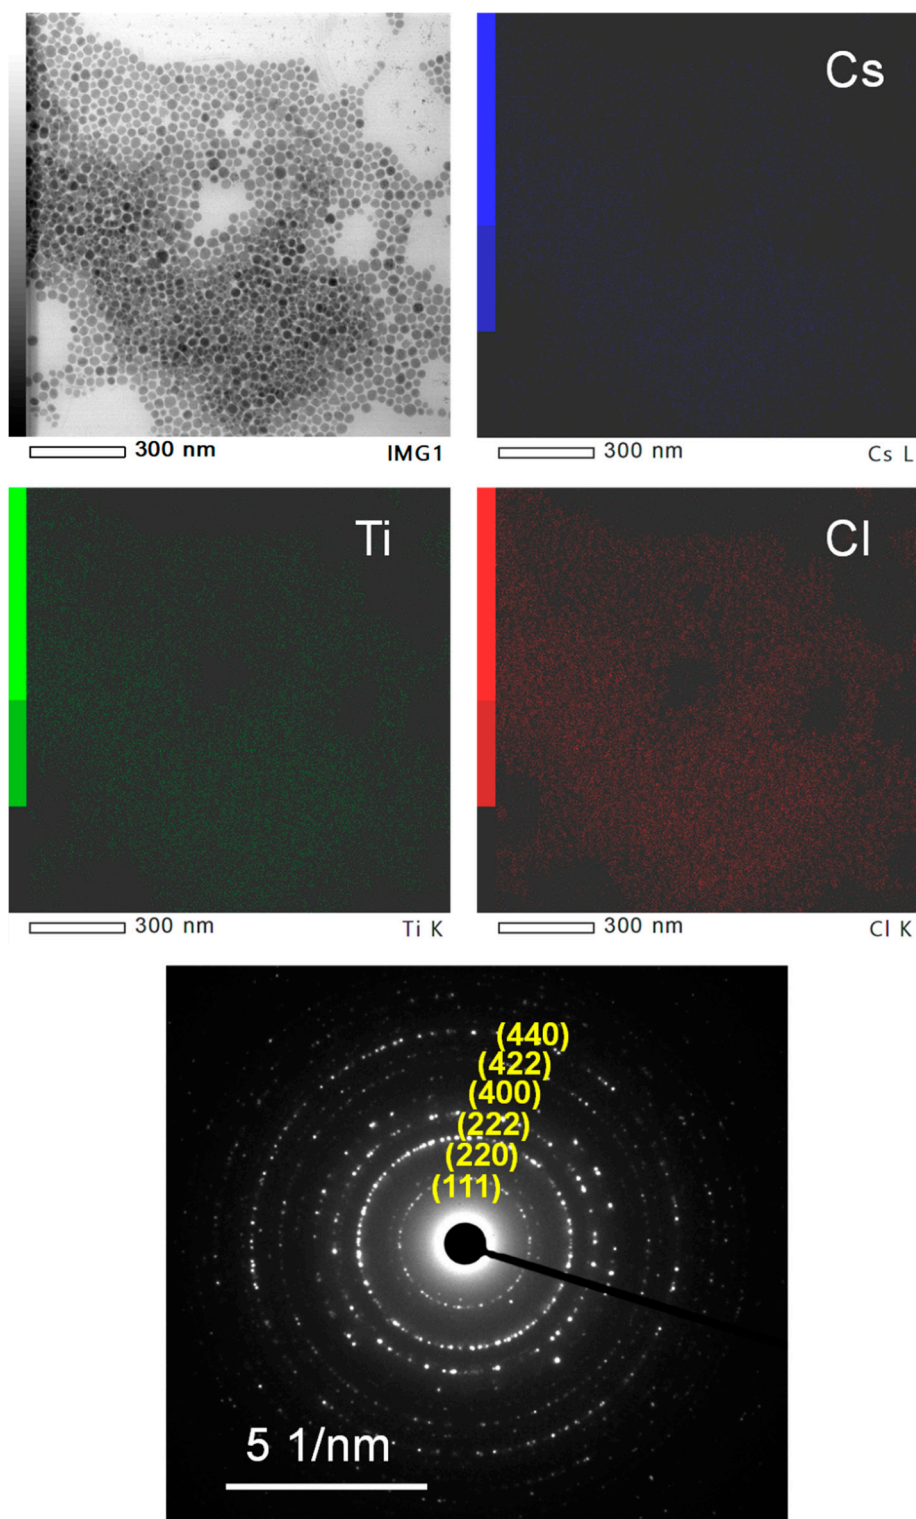

**Figure S2.** Elemental (Cs, Ti, and Cl) mapping obtained by energy-dispersive X-ray spectroscopy shows the uniformity of the elemental distribution in the  $\text{Cs}_2\text{TiCl}_6$  NCs and the corresponding scanning transmission electron microscope image. The lattice plane indexing on selective area electron diffraction pattern of the  $\text{Cs}_2\text{TiCl}_6$  NCs.

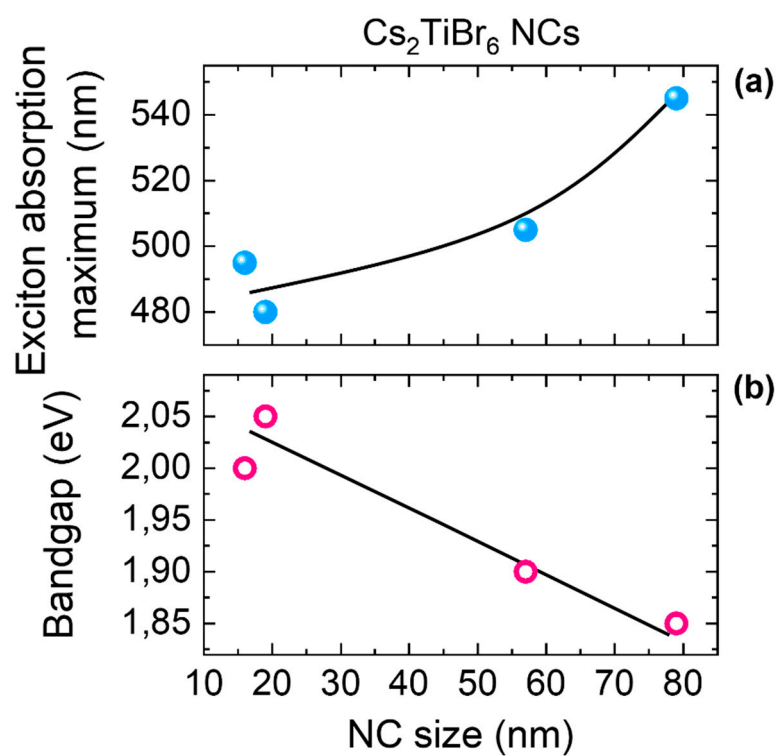

**Figure S3.** The variation of (a) excitonic absorption maximum and (b) bandgap of  $\text{Cs}_2\text{TiBr}_6$  NCs as a function of the particle size. The solid lines are just a guide to eye.

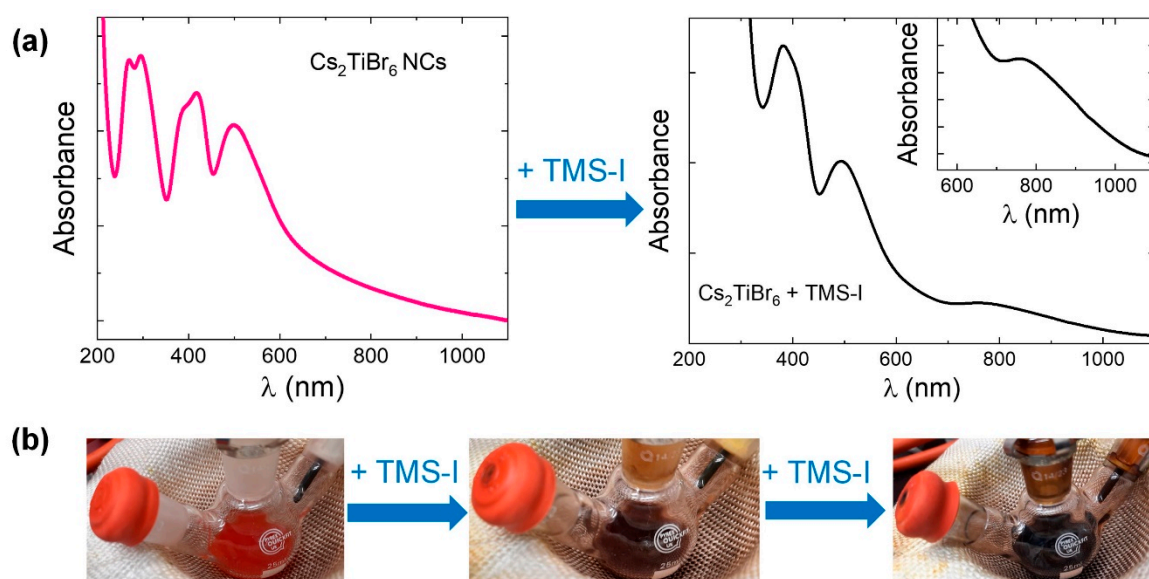

**Figure S4.** (a) The absorption spectrum before and after the anion exchange reaction of  $\text{Cs}_2\text{TiBr}_6$  NCs with TMS-I at room temperature. (b) The change in the NC solution color (under room light) as the reaction progress.

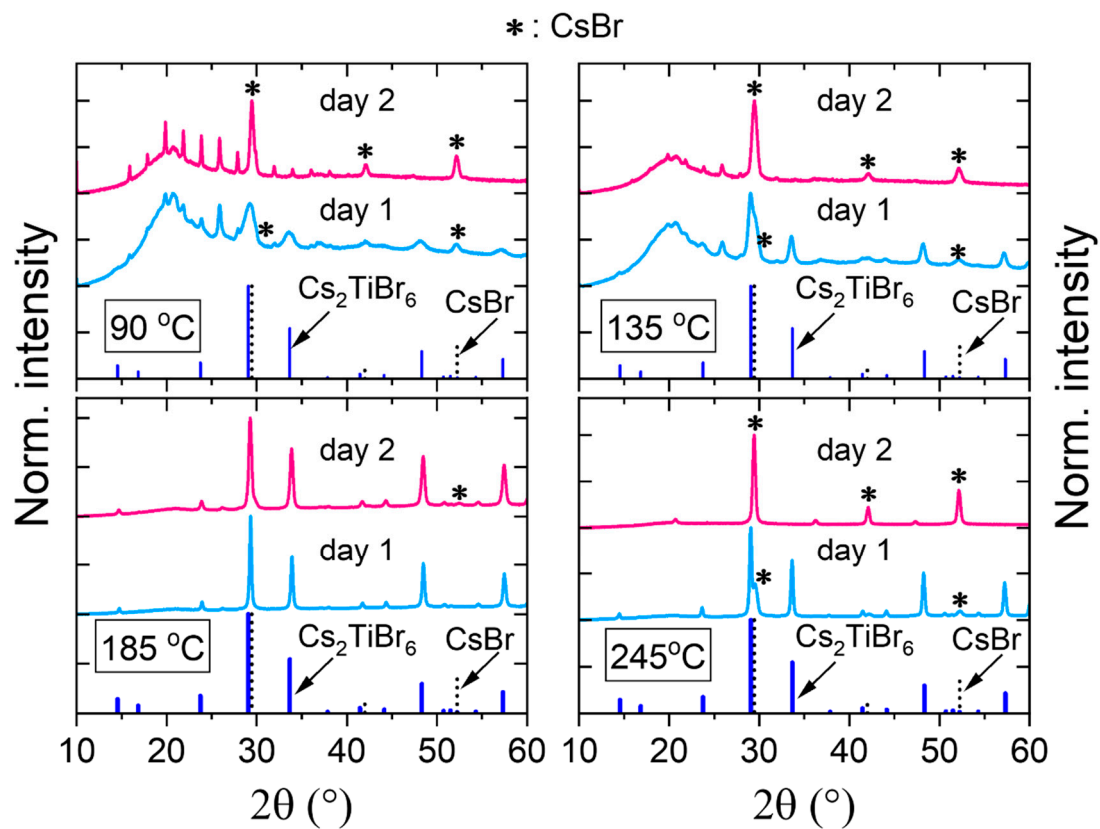

**Figure S5.** XRD patterns of films of  $\text{Cs}_2\text{TiBr}_6$  NCs synthesized at different temperatures (given in the respective panels) on day 1 and day 2 of exposure to ambient atmosphere (RH 40%,  $T=25^\circ\text{C}$ ).

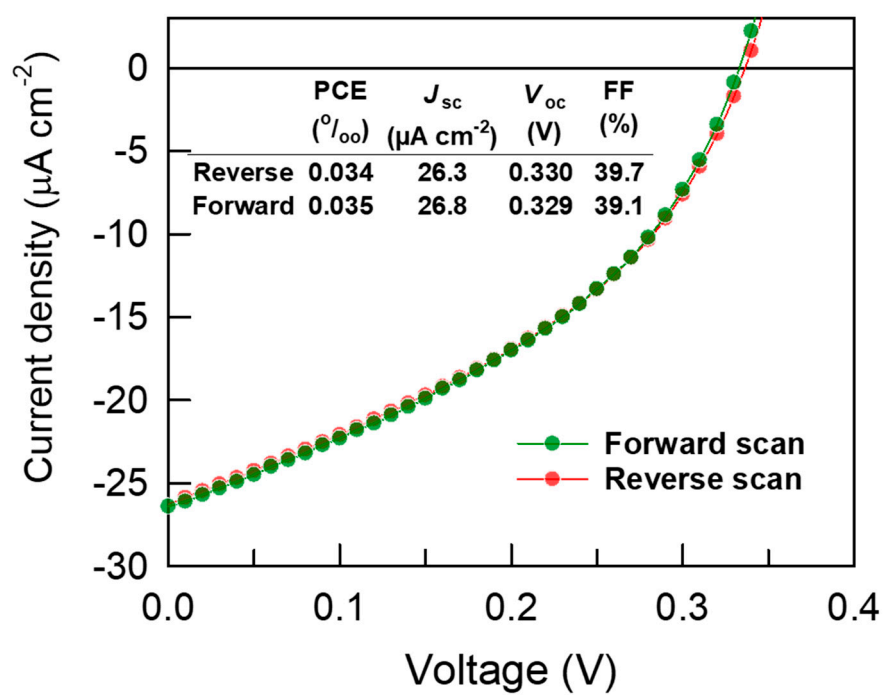

**Figure S6.**  $J$ - $V$  curves of the best  $Cs_2TiBr_6$  NC-based solar cell under forward and reverse scans. The scan rate is  $20\ mV\ s^{-1}$  and the active area is  $20\ mm^2$ .

**Table S1.** Structural parameters obtained for Cs<sub>2</sub>TiBr<sub>6</sub> phase on performing Rietveld refinement on Cs<sub>2</sub>TiBr<sub>6</sub>NC film XRD pattern at room temperature. The numbers in parentheses are the estimated standard deviations of the last significant figure.

| Atom | Wyckoff position | <i>x</i> | <i>y</i> | <i>z</i>  | 100xU <sub>iso</sub> (Å) <sup>2</sup> |
|------|------------------|----------|----------|-----------|---------------------------------------|
| Cs   | 8 <i>c</i>       | 0.25     | 0.25     | 0.25      | 0.0616(7)                             |
| Ti   | 4 <i>a</i>       | 0        | 0        | 0         | 0.0513(4)                             |
| Br   | 24 <i>e</i>      | 0        | 0        | 0.2451(7) | 0.0535(12)                            |



**Table S2.** Structural parameters obtained for Cs<sub>2</sub>TiCl<sub>6</sub> phase on performing Rietveld refinement on Cs<sub>2</sub>TiCl<sub>6</sub> NC film XRD pattern at room temperature. The numbers in parentheses are the estimated standard deviations of the last significant figure.

| Atom | Wyckoff position | <i>x</i> | <i>y</i> | <i>z</i>  | 100xU <sub>iso</sub> (Å) <sup>2</sup> |
|------|------------------|----------|----------|-----------|---------------------------------------|
| Cs   | 8 <i>c</i>       | 0.25     | 0.25     | 0.25      | 0.0126(17)                            |
| Ti   | 4 <i>a</i>       | 0        | 0        | 0         | 0.0126(12)                            |
| Cl   | 24 <i>e</i>      | 0        | 0        | 0.2451(7) | 0.2322(9)                             |

**Table S3.** Molar ratio determination between Cs and Ti in Cs<sub>2</sub>TiCl<sub>6</sub> and Cs<sub>2</sub>TiBr<sub>6</sub> NCs by ICP-MS.

| Material                          | Cs (μmoles/l) | Ti (μmoles/l) | Cs:Ti     |
|-----------------------------------|---------------|---------------|-----------|
| Cs <sub>2</sub> TiCl <sub>6</sub> | 7.82          | 3.90          | 2.00:1.00 |
| Cs <sub>2</sub> TiBr <sub>6</sub> | 8.99          | 4.96          | 1.81:1.00 |

**Table S4.** Summary of temperature-dependent size and shape evolution of Cs<sub>2</sub>TiBr<sub>6</sub> and Cs<sub>2</sub>TiCl<sub>6</sub> NCs, from the TEM images presented in Figure 2.

| Material                          | Temperature (°C)       | Avg. Diameter (nm) | Shape                  |
|-----------------------------------|------------------------|--------------------|------------------------|
| Cs <sub>2</sub> TiBr <sub>6</sub> | 90                     | 19±1.5             | Sphere/ellipsoid       |
|                                   | 135                    | 16±2.8             | Spherical              |
|                                   | 185                    | 57±16              | Cube                   |
|                                   | 185 ( <i>no OlAm</i> ) | --                 | Agglomerated particles |
|                                   | 245                    | 79±44              | Prisms                 |
| Cs <sub>2</sub> TiCl <sub>6</sub> | 185                    | 31±4.7             | Spheres                |

List of abbreviations

Diisopropoxide bis(acetylacetonate) (TDBA)

Energy-dispersive X-ray spectroscopy (EDS)

Inductively coupled plasma mass spectroscopy (ICP-MS)

Nanocrystals (NCs)

Octadecene (ODE)

Oleic acid (OA)

Oleylamine (OlAm)

Photoluminescence (PL)

Power conversion efficiency (PCE)

Scanning transmission electron microscopy (STEM)

Third-harmonic generation (THG)

Transmission electron microscope (TEM)

X-ray diffraction (XRD)

Bromotrimethylsilane (TMS-Br)

Chlorotrimethylsilane (TMS-Cl)

Iodotrimethylsilane (TMS-I)
